# Supplementary material
Source: PubMed Central journal article supplement (PMC4766454)
Supplement: EMBR-16-1308-s001.pdf [file EMBR-16-1308-s001.pdf]

## Expanded View Figures

### Comparison of mouse and *Nematostella* complexin sequences

|        |                                                                                                                                                                                                          |     |
|--------|----------------------------------------------------------------------------------------------------------------------------------------------------------------------------------------------------------|-----|
| mCpx1  | MEFV <b>MKQALGGATKDMGKMLGGDEEK</b> -----DPDAAK <b>KEEER</b> -QEAL <b>RQAEERKAKYAKMEAE</b> REVMRQGI <b>RDKYGI</b>                                                                                         | 72  |
| mCpx2  | MDFV <b>MKQALGGATKDMGKMLGGEEK</b> -----DPDAQ <b>KKEEER</b> -QEAL <b>RQEEERKAKHARMEAE</b> REKVRQOI <b>RDKYGL</b>                                                                                          | 72  |
| mCpx3  | MAF <b>VMKSMVGGQLKNI</b> TGSLGGGEDKGDGDS-AAEAQ <b>GMSREYEEYQKQLV</b> EEEKMERDAQ <b>FTQ</b> RKAERATL <b>RS</b> HFRDKYRL                                                                                   | 82  |
| mCpx4  | MA <b>FFVKNMIS</b> NQV <b>KNLG</b> FGGG <b>GSEKKEEG</b> TS <b>DPAAAKGM</b> TREY <b>EEYQKQMI</b> EEEKMERDA <b>AF</b> TQ <b>KAERAC</b> LRVHL <b>RD</b> KYRL                                                | 83  |
| nvCpx1 | MN <b>PLTKALV</b> TN <b>KLSSV</b> TKSI <b>GLDDK</b> DETTSE-----DAGV <b>SSKEMR</b> KMRE <b>KEEAERAK</b> REEM <b>YAKRNAD</b> REKK <b>REQMRA</b> KYGI                                                       | 77  |
| nvCpx2 | MA <b>SFAAKYL</b> VS <b>SATGK</b> VQ <b>STVGE</b> FT <b>R</b> DSS-----NDG <b>FKKEE</b> LE <b>KAEQQLQ</b> KDEQ <b>ERKKK</b> FA <b>KLAKR</b> SKHRE <b>KILNKYGI</b>                                         | 74  |
| mCpx-1 | KK <b>KEERE</b> A <b>EAQVAMEAN</b> SEGL <b>TRPKKAI</b> PPG <b>CGDEPEE</b> DE <b>SILDT</b> VIK <b>YLP</b> GPLQ <b>DMF</b> KK*                                                                             | 134 |
| mCpx-2 | KK <b>KEEKE</b> A <b>EKAAL</b> EQ <b>CEGS</b> L <b>TRPKKAI</b> PAG <b>CGDEE</b> EEEE <b>SILDT</b> VLK <b>YLP</b> GPLQ <b>DMF</b> KK*                                                                     | 134 |
| mCpx-3 | PK <b>NETDES</b> Q <b>IQLAG</b> ---D <b>VELPRE</b> LAK <b>MI</b> EEDT- <b>EEEE</b> D <b>KASV</b> L <b>GQ-LAS</b> LPGLD <b>LSSLK</b> DKA <b>Q</b> TT <b>LGD</b> L <b>KQSAE</b> -K <b>CHIM</b> *           | 158 |
| mCpx-4 | PK <b>SEMDET</b> Q <b>IQLAG</b> D---D <b>VDLP</b> EDL <b>RKMV</b> DEDQ- <b>DEEE</b> E <b>KD</b> S <b>ILGQ-LQ</b> NLQ <b>NMD</b> LDT <b>IK</b> EKA <b>Q</b> AT <b>FT</b> E <b>IKQSAE</b> Q <b>KCSVM</b> * | 159 |
| nvCpx1 | Q <b>KDK-D</b> GP <b>PKSGG</b> HK-- <b>EEG</b> S <b>DAP</b> TR <b>KGSL</b> NRE-- <b>KSSE</b> ED <b>DN</b> -----K <b>CAIM</b> *                                                                           | 121 |
| nvCpx2 | E <b>KSKR</b> HE <b>PMETH</b> SAA-- <b>KML</b> S <b>IRGN</b> SEER <b>DYL-L</b> DE <b>EE</b> DD <b>GC</b> S <b>PCT</b> NC <b>T</b> CF <b>PLRSK</b> T <b>KIV</b> *                                         | 135 |

Figure EV1. Alignment of mouse and *Nematostella* complexin sequences.

Alignment of complexin sequences from mouse (mCpx1–4) and *Nematostella vectoriensis* (nvCpx1 and 2). Sequences are shown in single-letter amino acid code; residues shared by 6, 5, or 4 of the 6 sequences are highlighted in yellow, green, and blue, respectively. Conserved hydrophobic sequences are highlighted in red, and C-terminal cysteine residues that are presumably isoprenylated are displayed on a black background.

#### A Cumulative charge transfer during 10 Hz stimulus trains

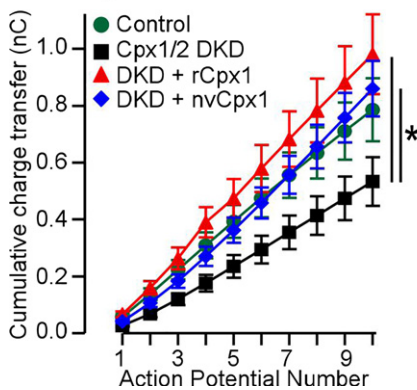

#### B Normalized synchronous EPSCs during 10 Hz stimulus trains

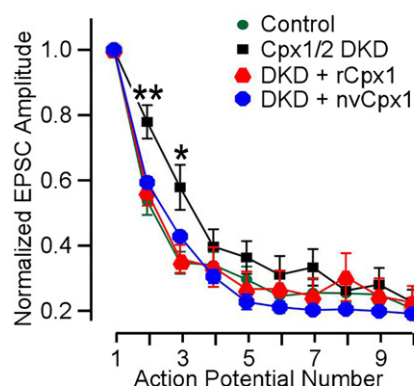

Figure EV2. Analysis of the kinetics of evoked NMDA receptor-dependent EPSCs (related to Fig 4E).

A The plot of cumulative charge transfer during the 10-Hz stimulus train as a function of the action potential number is recorded in WT cortical neurons that were infected with a control lentivirus (Control) or a lentivirus expressing complexin shRNAs (Cpx1/2 DKD) without or with co-expression of rCpx1 or nvCpx1.

B The degree of synaptic depression as a function of the action potential number is plotted as described for (A).

Data information: Data shown are means  $\pm$  SEM; statistical assessments were performed by two-way ANOVA (A) or Student's *t*-test (B) comparing each condition to control ( $*P < 0.05$ ;  $**P < 0.01$ ). The data from the experiments shown in Fig 4E, and the number of neurons/cultures analyzed correspond to those listed in the legend to Fig 4E.

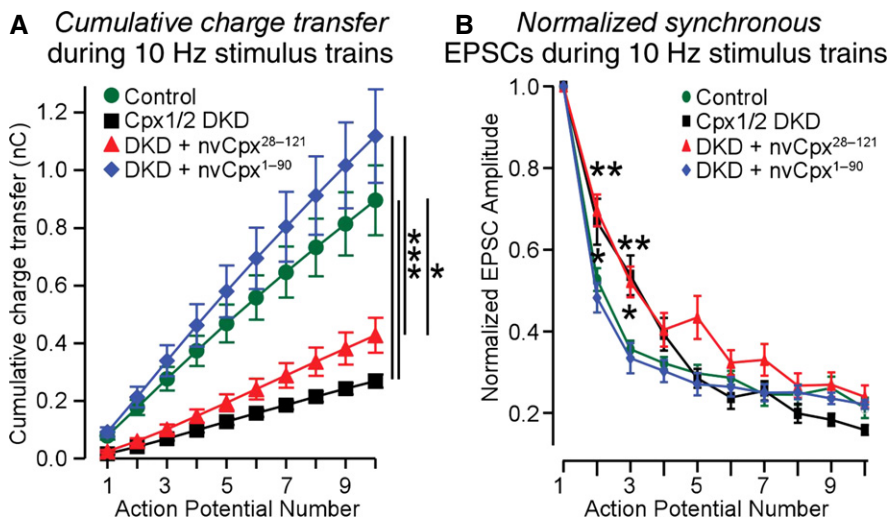

**Figure EV3. Analysis of the kinetics of evoked NMDA receptor-dependent EPSCs (related to Fig 5E).**

- A The plot of cumulative charge transfer during the 10-Hz stimulus train as a function of the action potential number is recorded in WT cortical neurons that were infected with a control lentivirus (Control) or a lentivirus expressing complexin shRNAs (Cpx1/2 DKD) without or with co-expression of nvCpx<sup>28-121</sup> or nvCpx<sup>1-90</sup>.
- B The degree of synaptic depression as a function of the action potential number is plotted as described for (A).

Data information: Data shown are means  $\pm$  SEM; statistical assessments were performed by two-way ANOVA (A) or Student's *t*-test (B) comparing each condition to control ( $*P < 0.05$ ;  $**P < 0.01$ ;  $***P < 0.001$ ). The data from the experiments shown in Fig 5E, and the number of neurons/cultures analyzed correspond to those listed in the legend to Fig 5E.
